# Supplementary material
Source: Research Square preprint supplement (doi:10.21203/rs.3.rs-9696448/v1)

1. **YAP- samples (17) Nuer(14) and Maokomo (3) with M13, M60, M89 and M42**

**Samples:**

**Nuer4,14,20,34,45,47,48 + Brt 2,7,18,22,24, + Gmz 6,21,23,28,30 = 17**

1. With M13


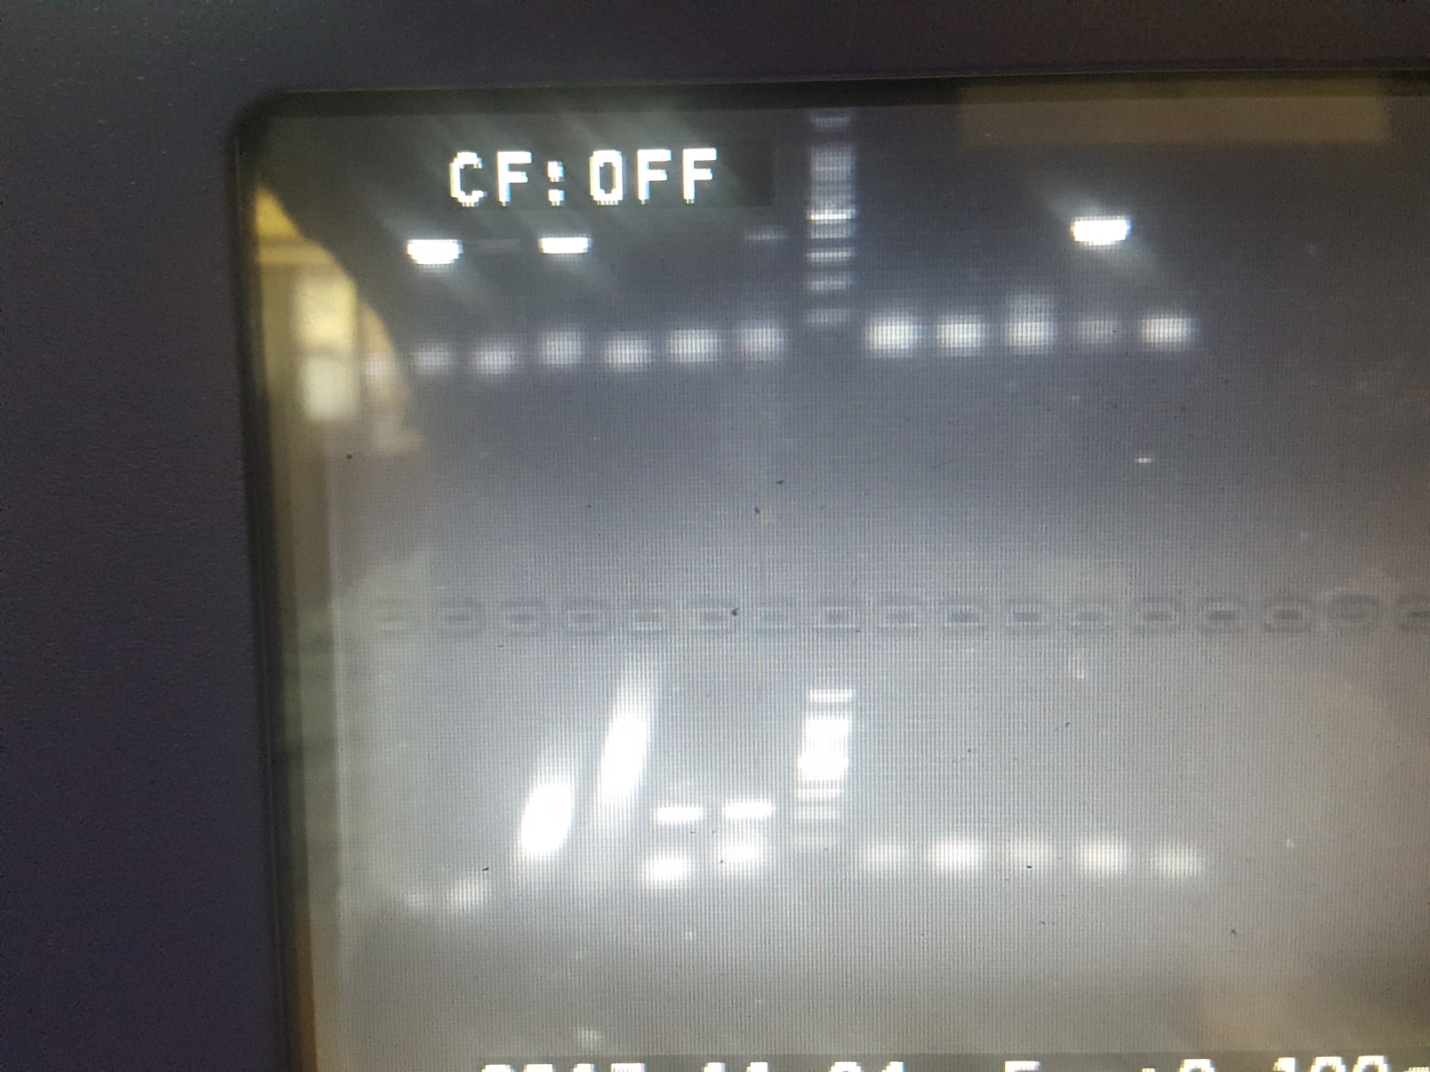


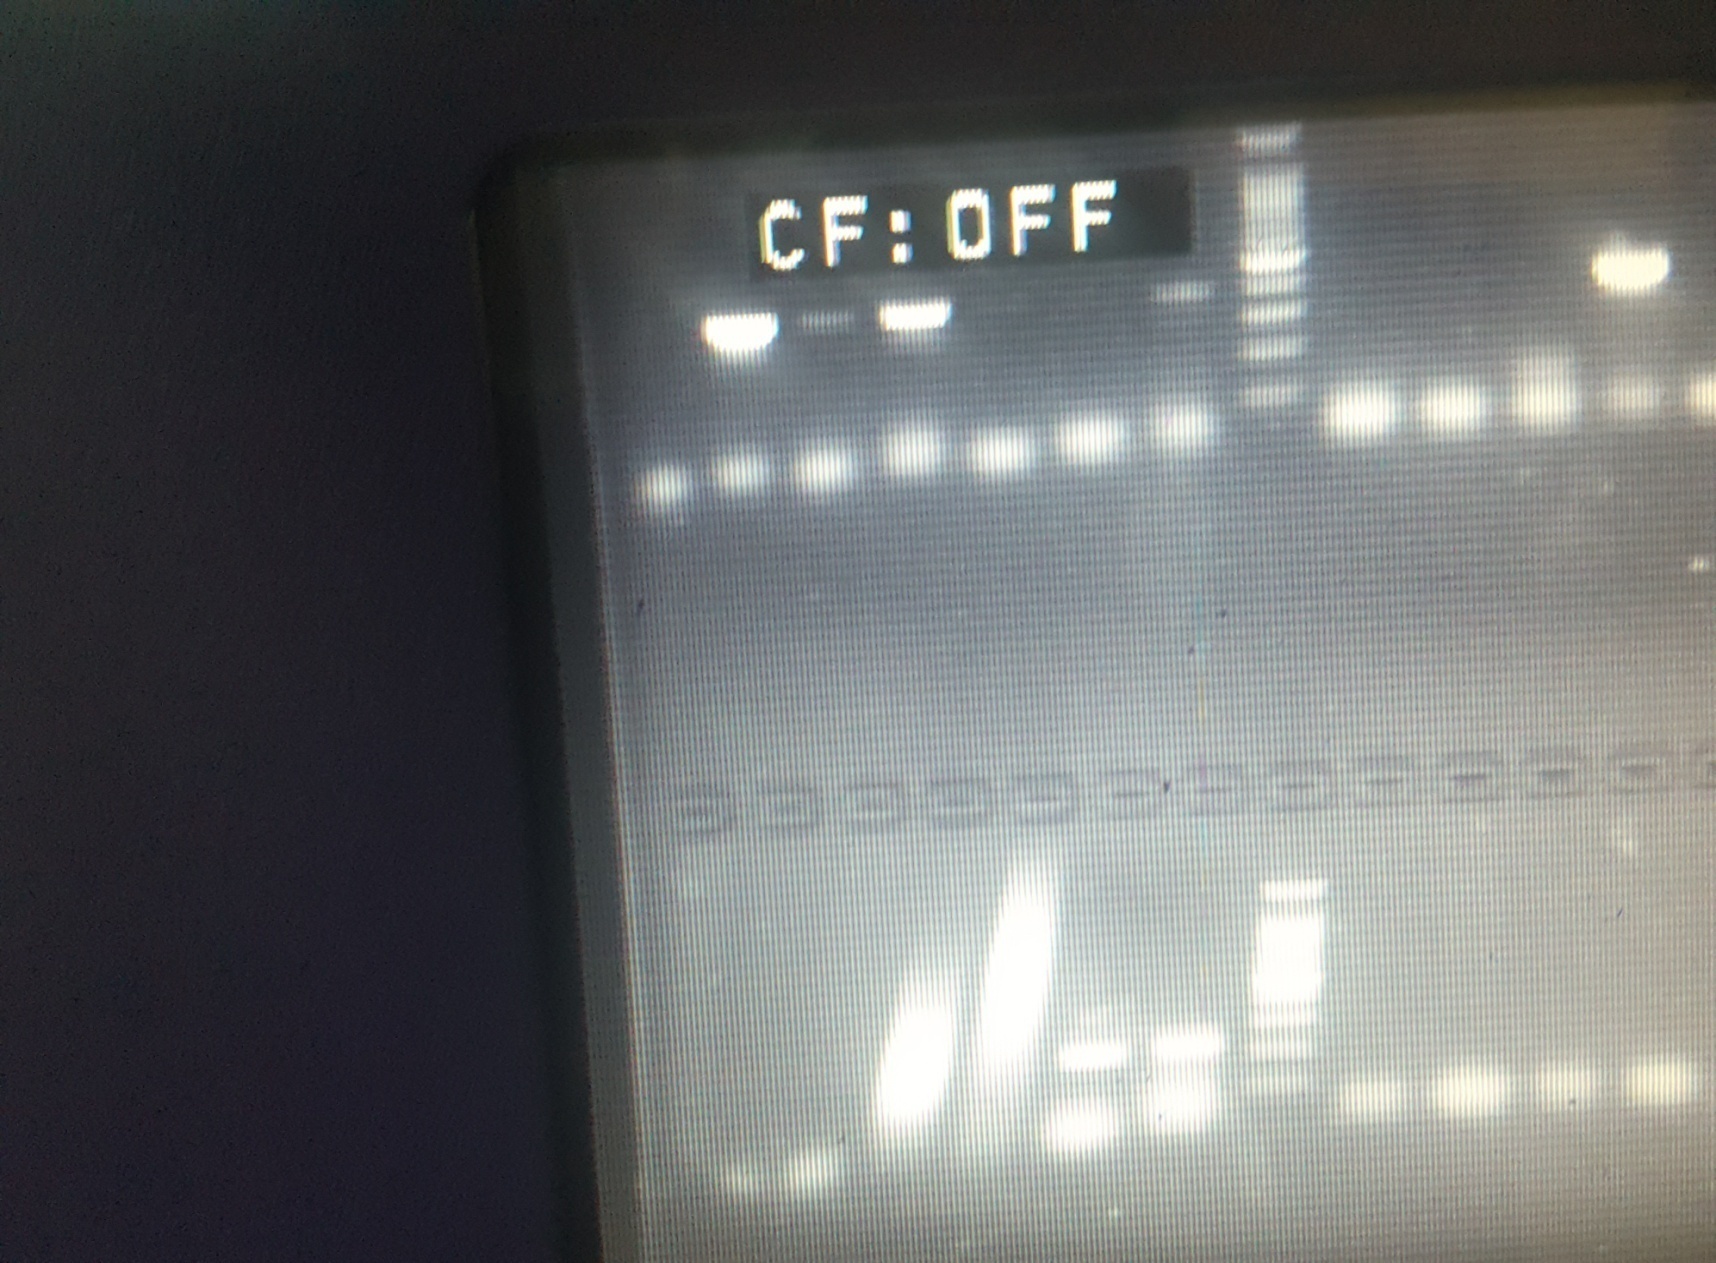


1. With M60


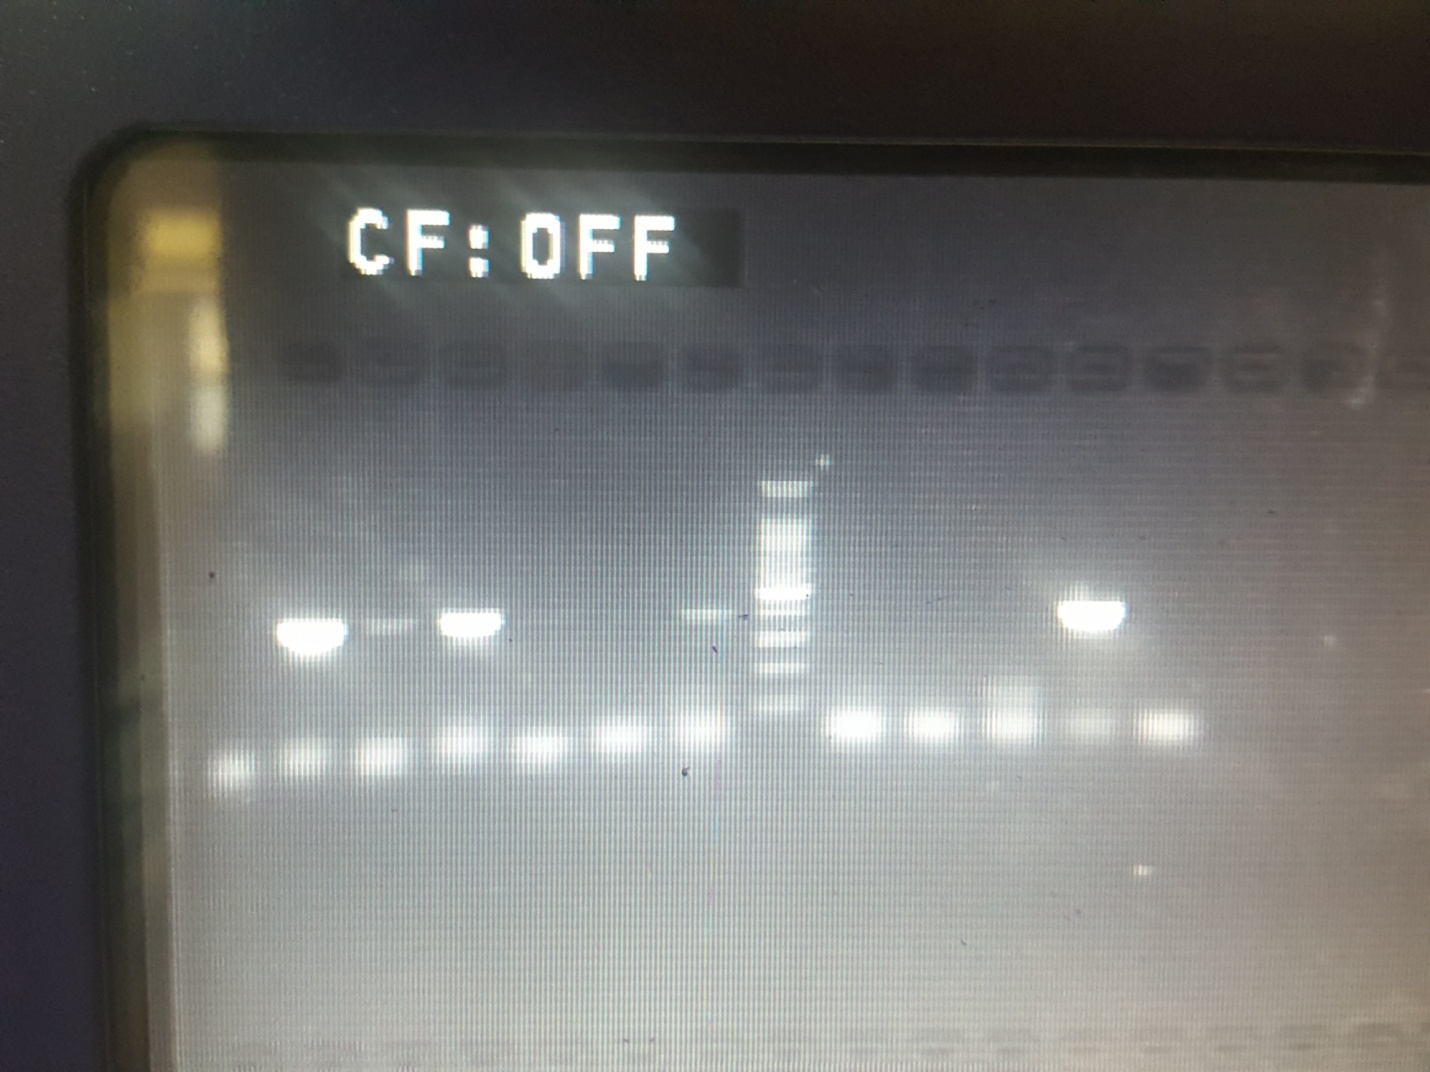


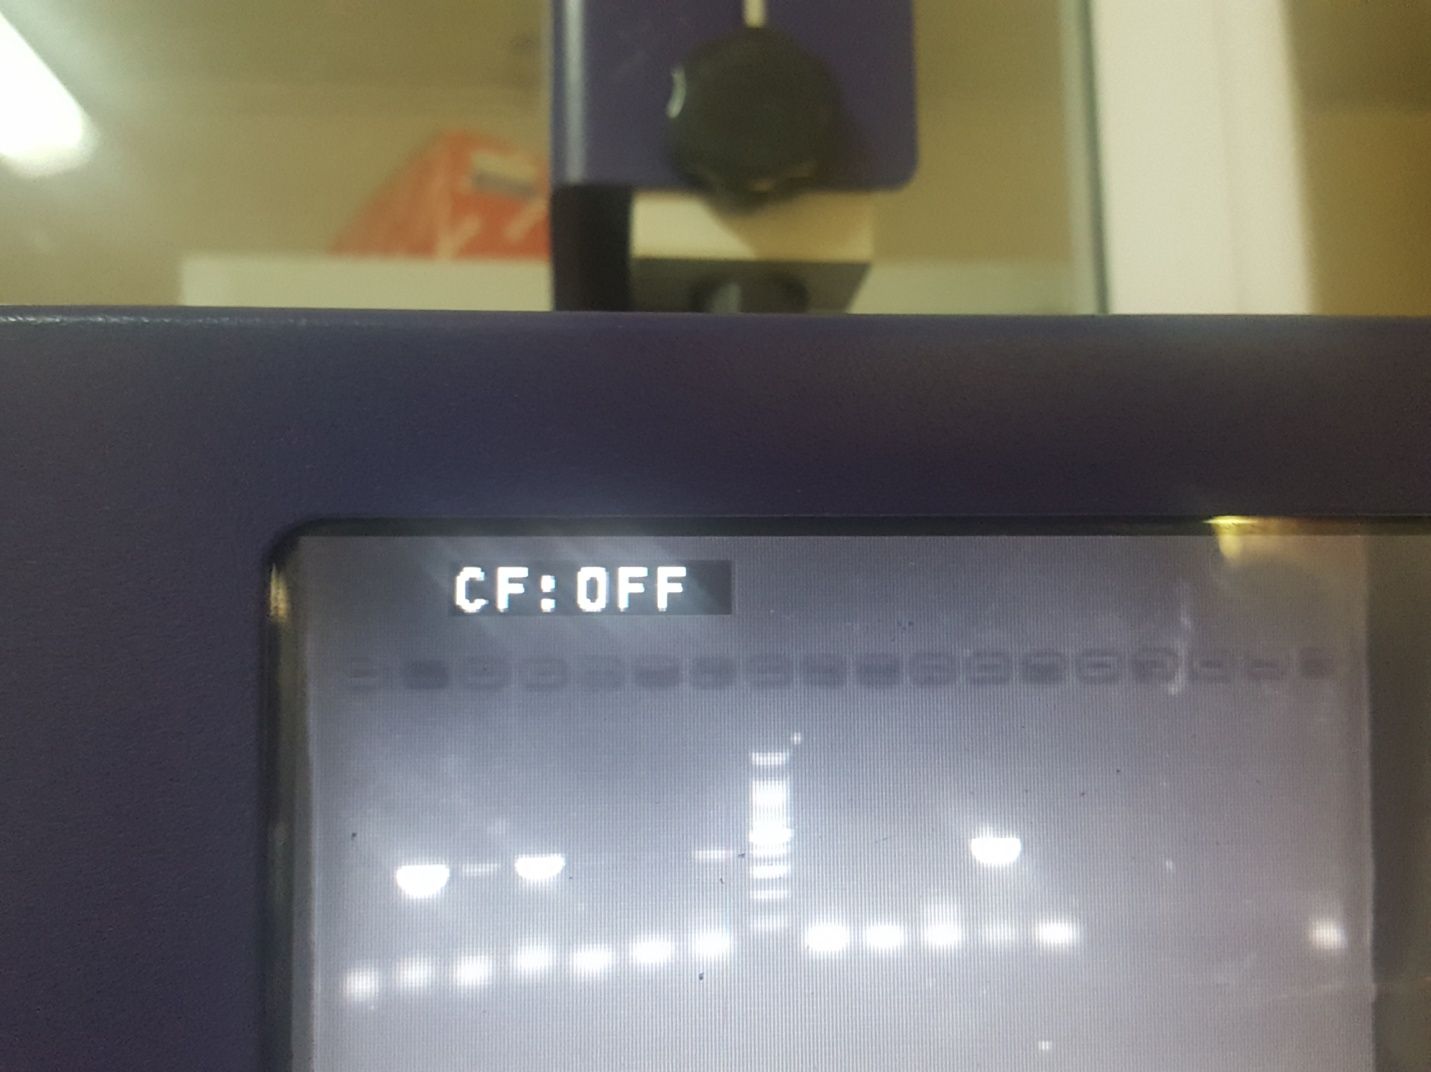


Modified


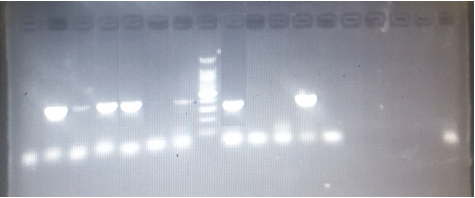


1. With M89


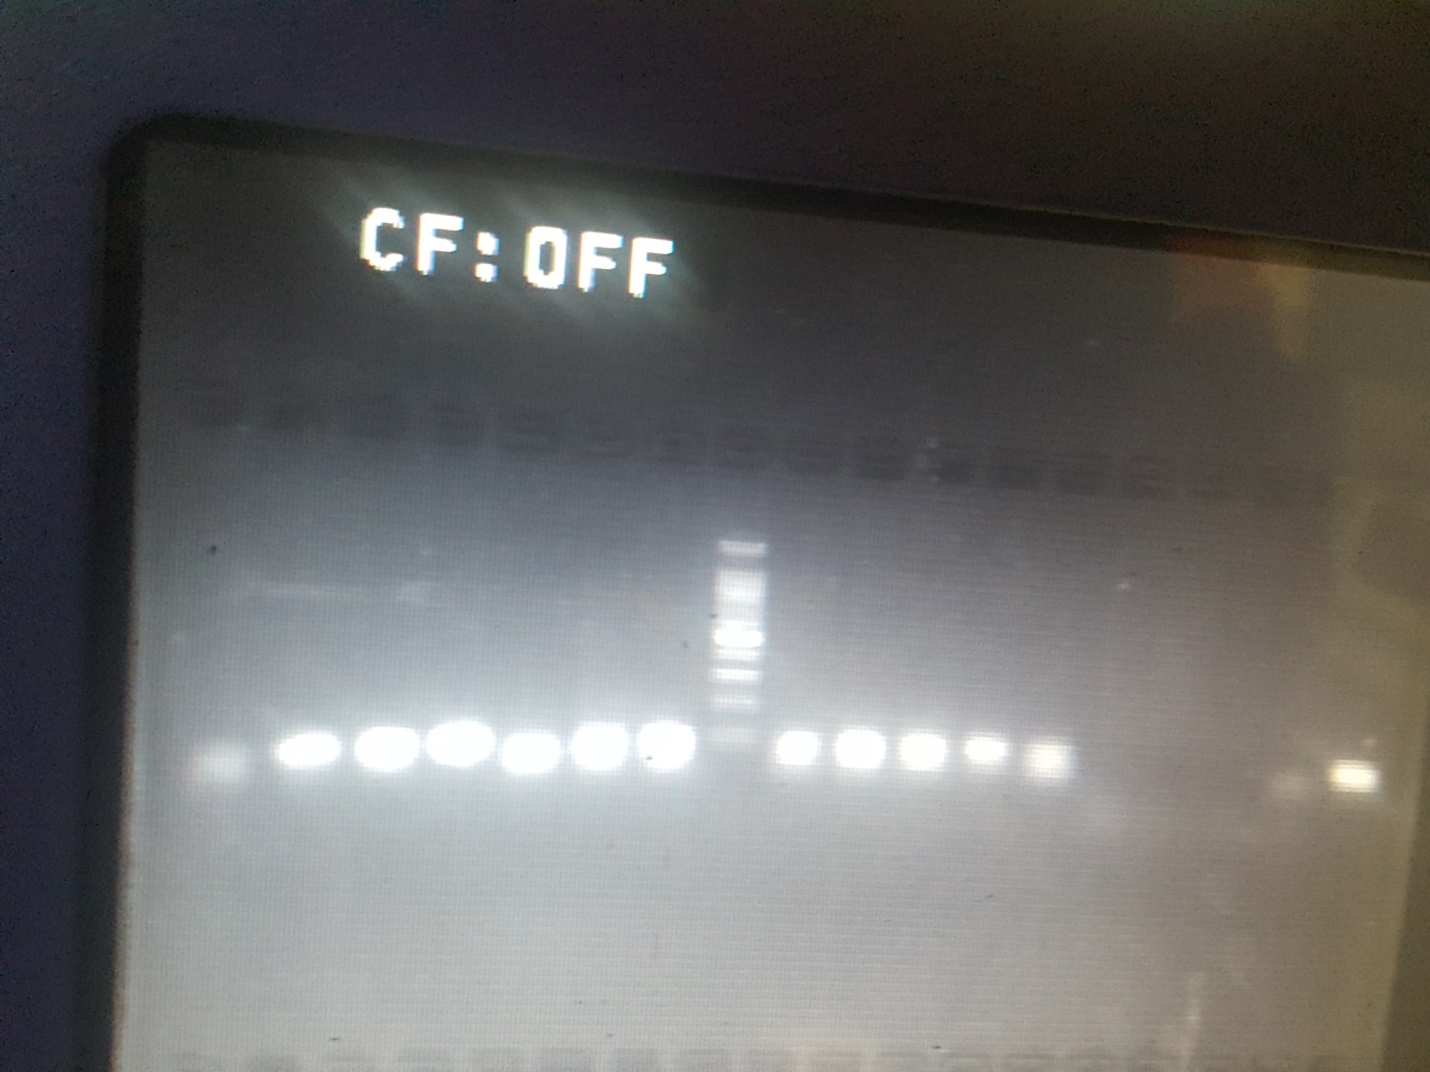


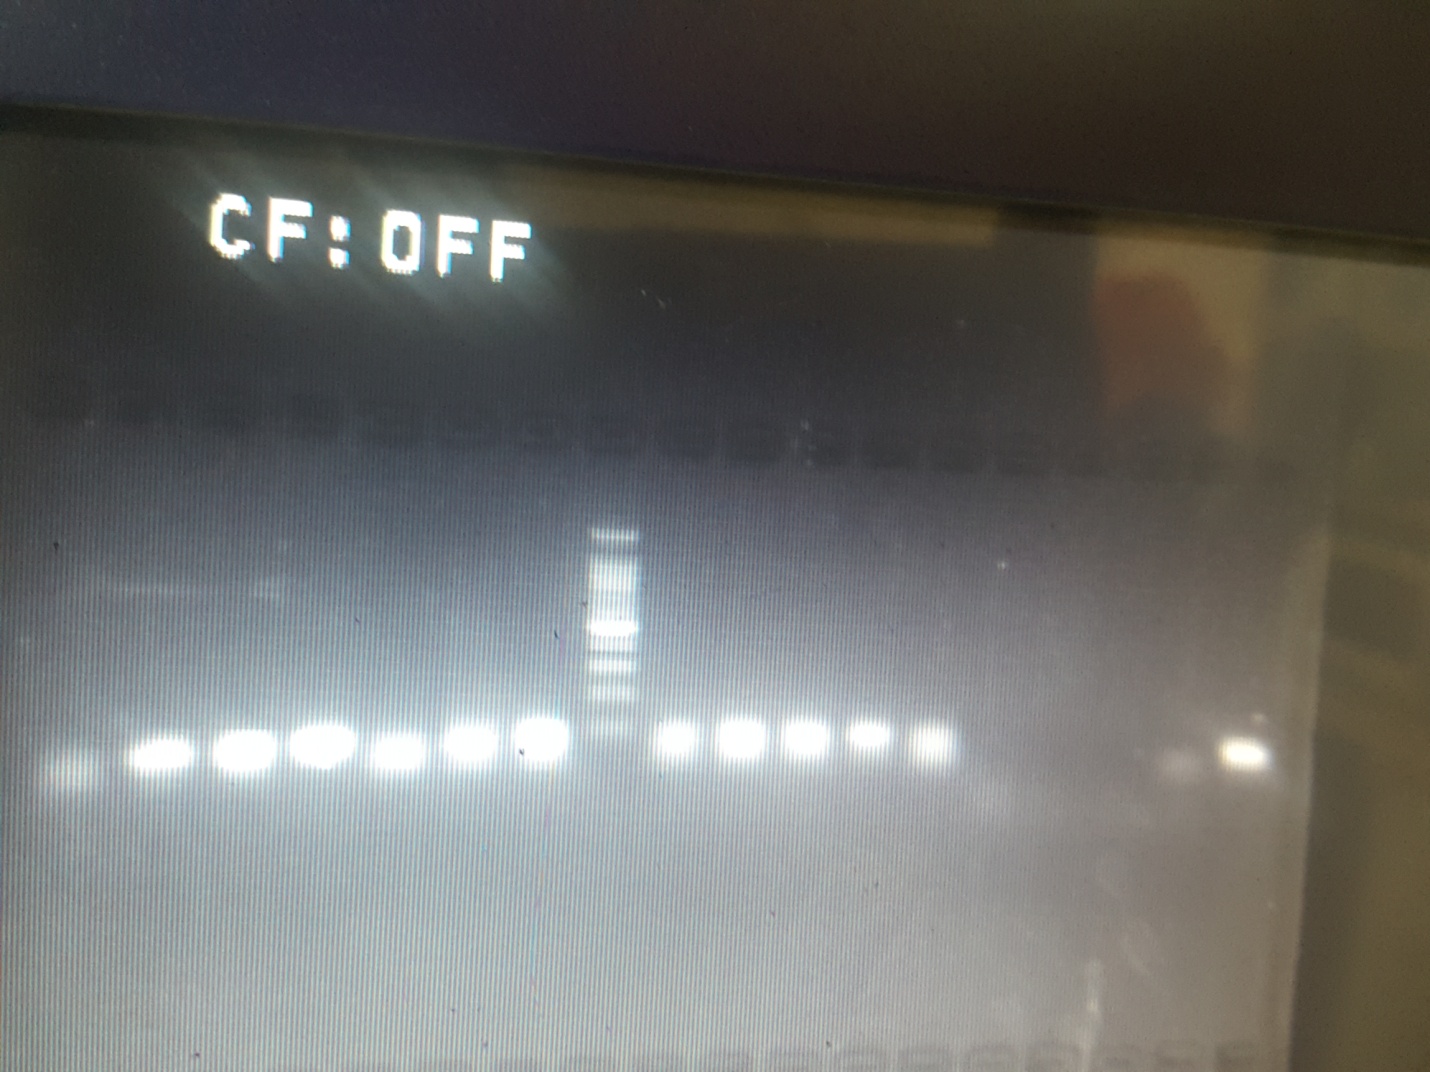


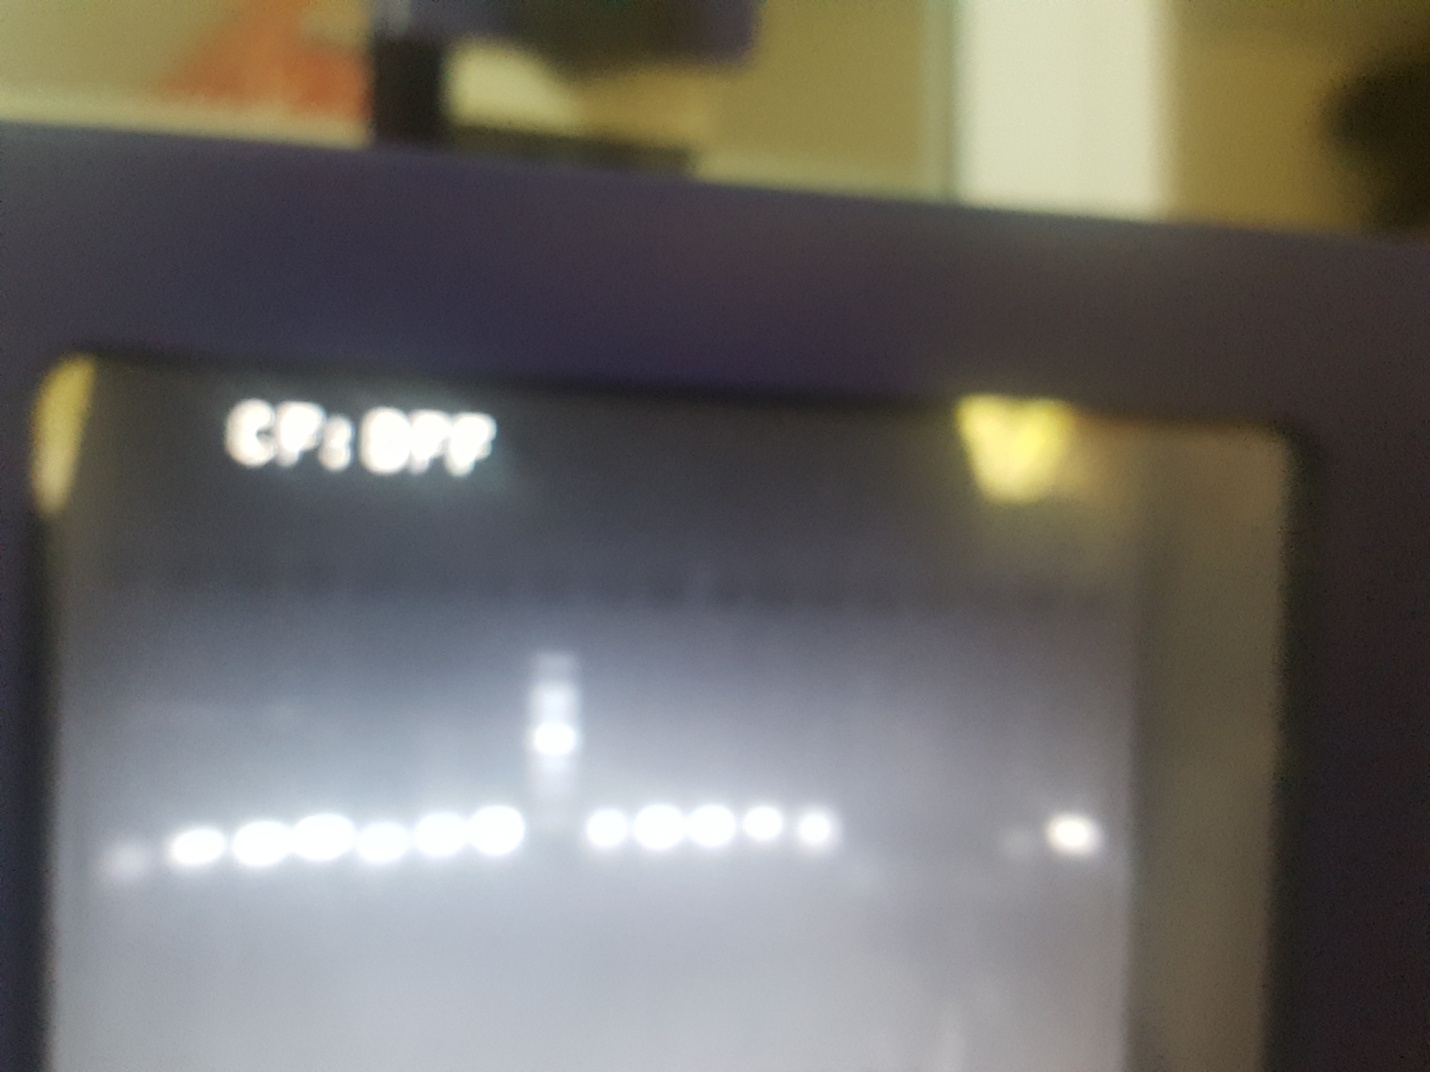


1. With M42


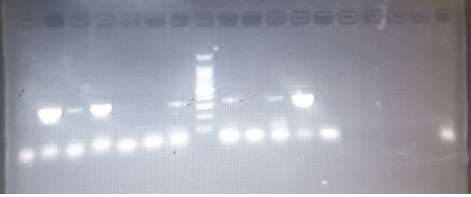


M42 N4,20,34-------


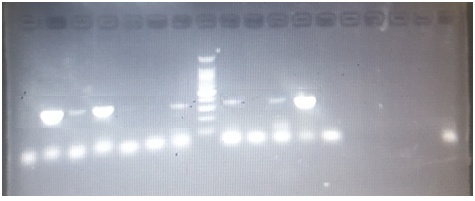


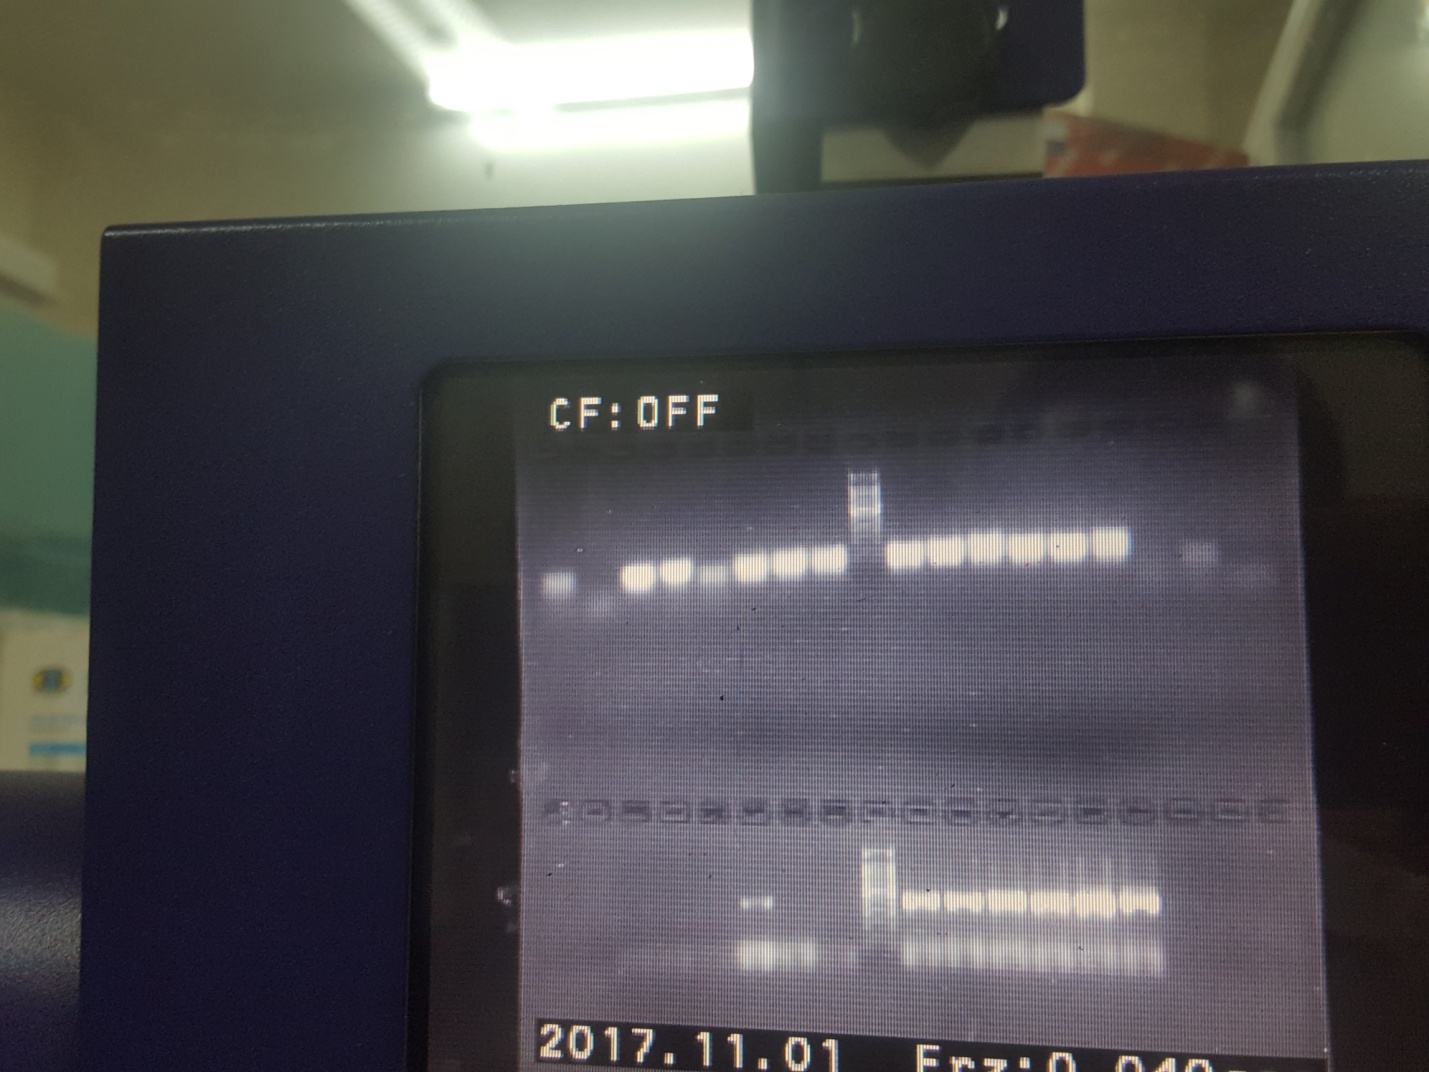


M89


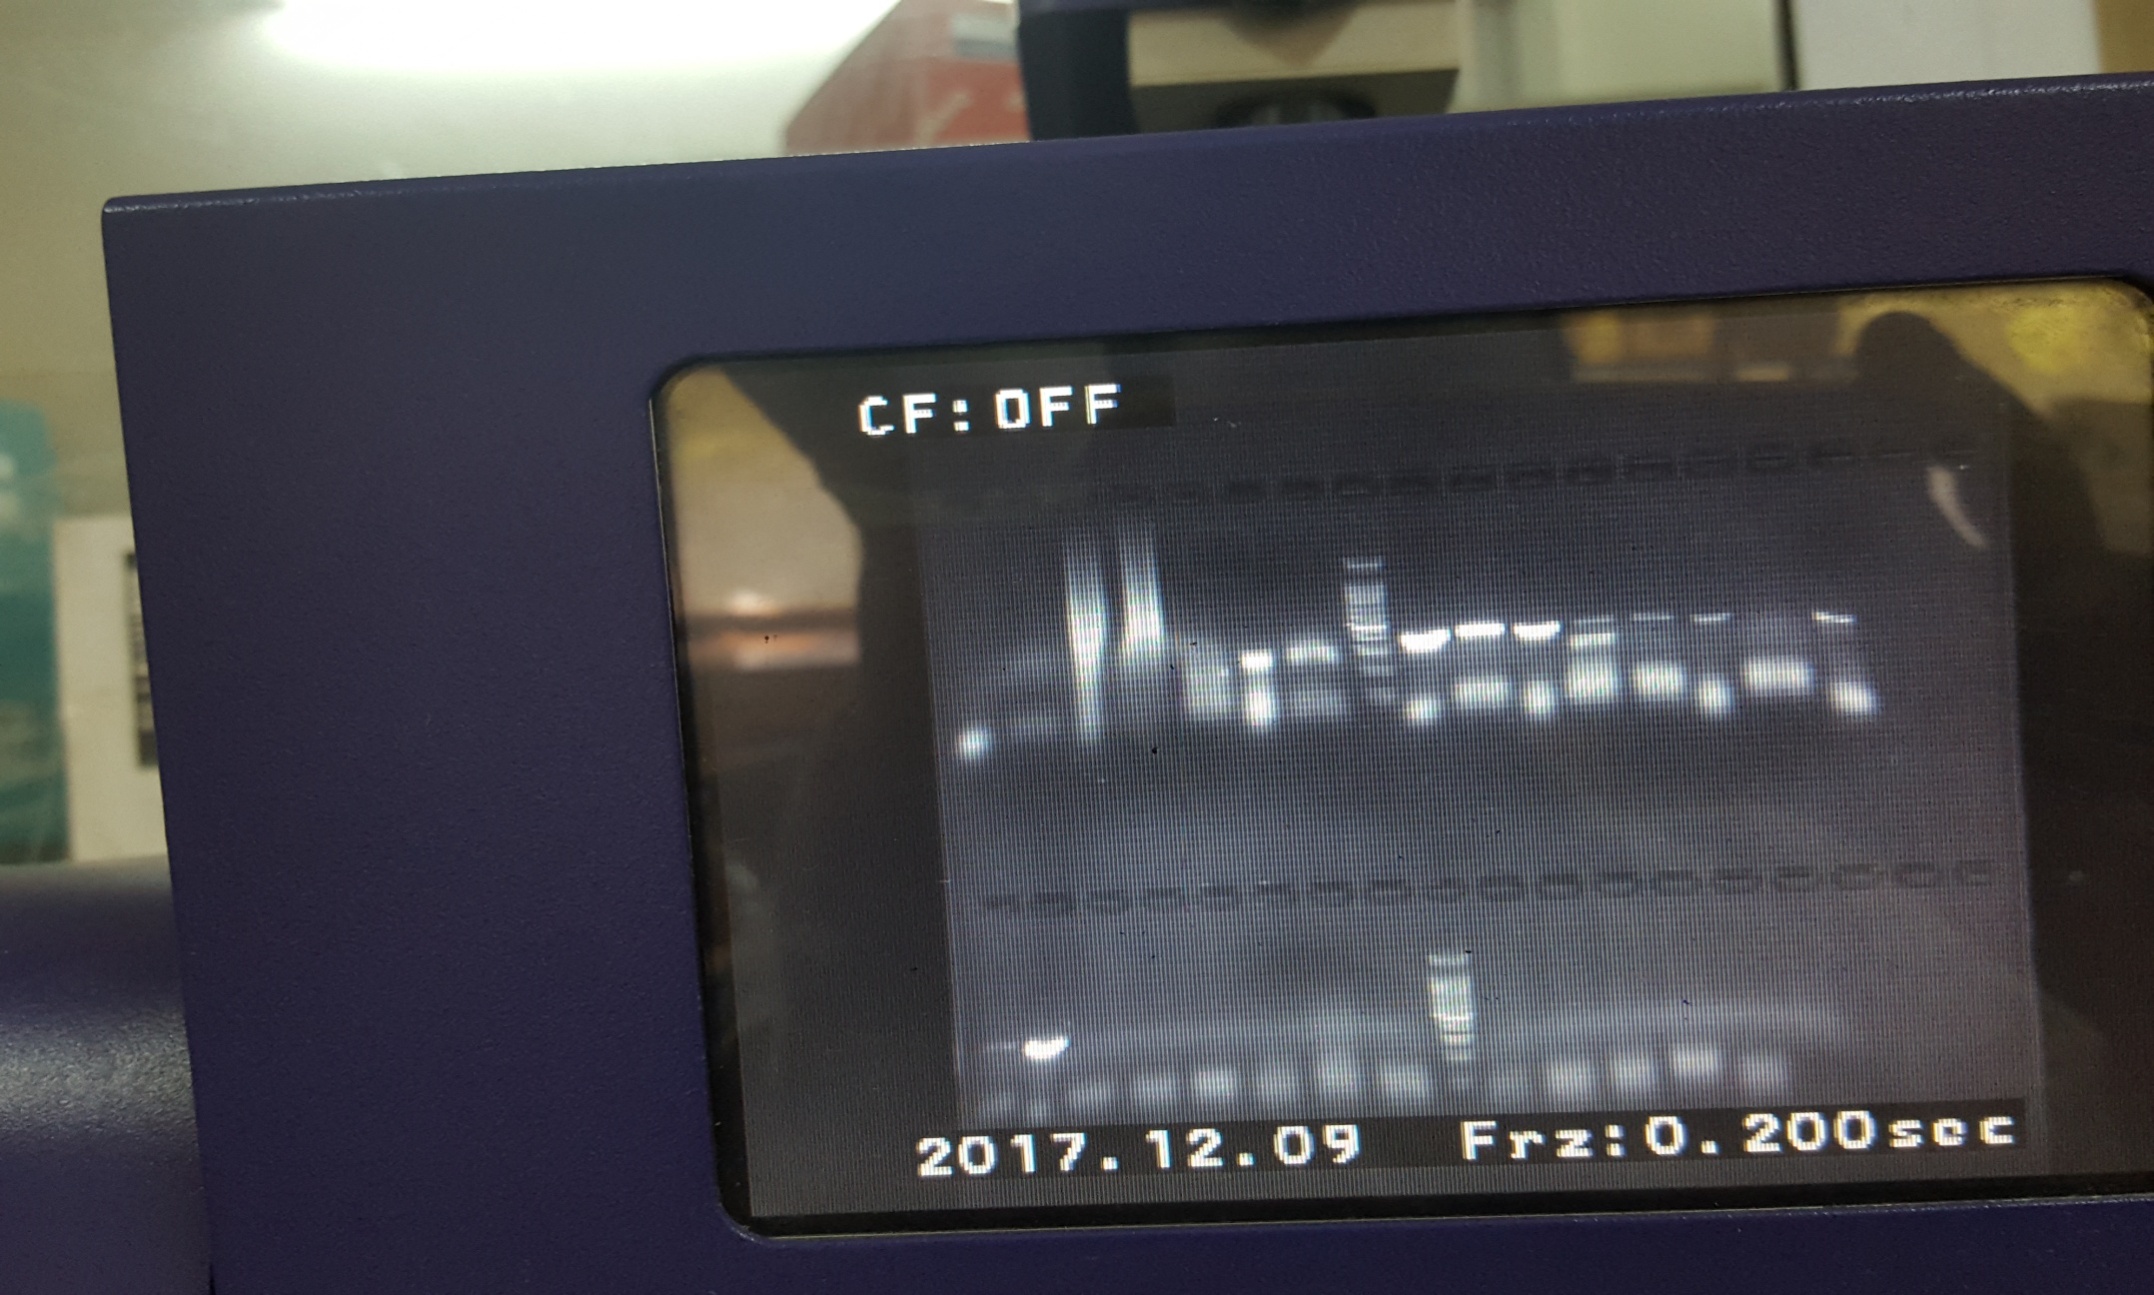


M13, M60


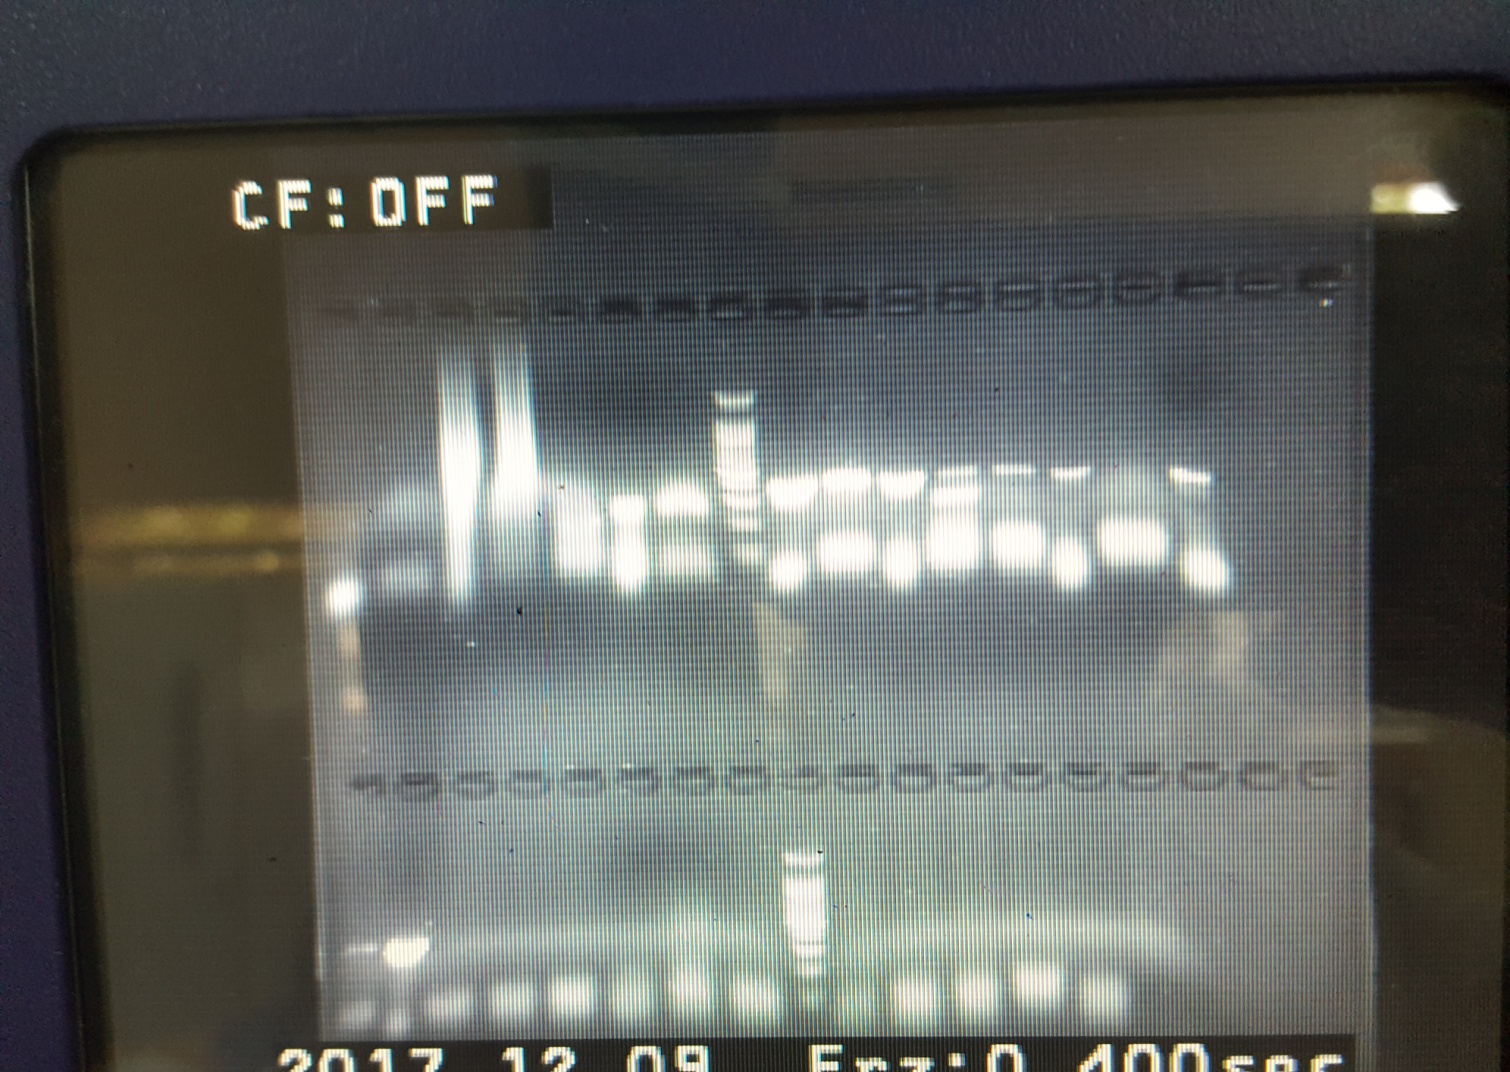


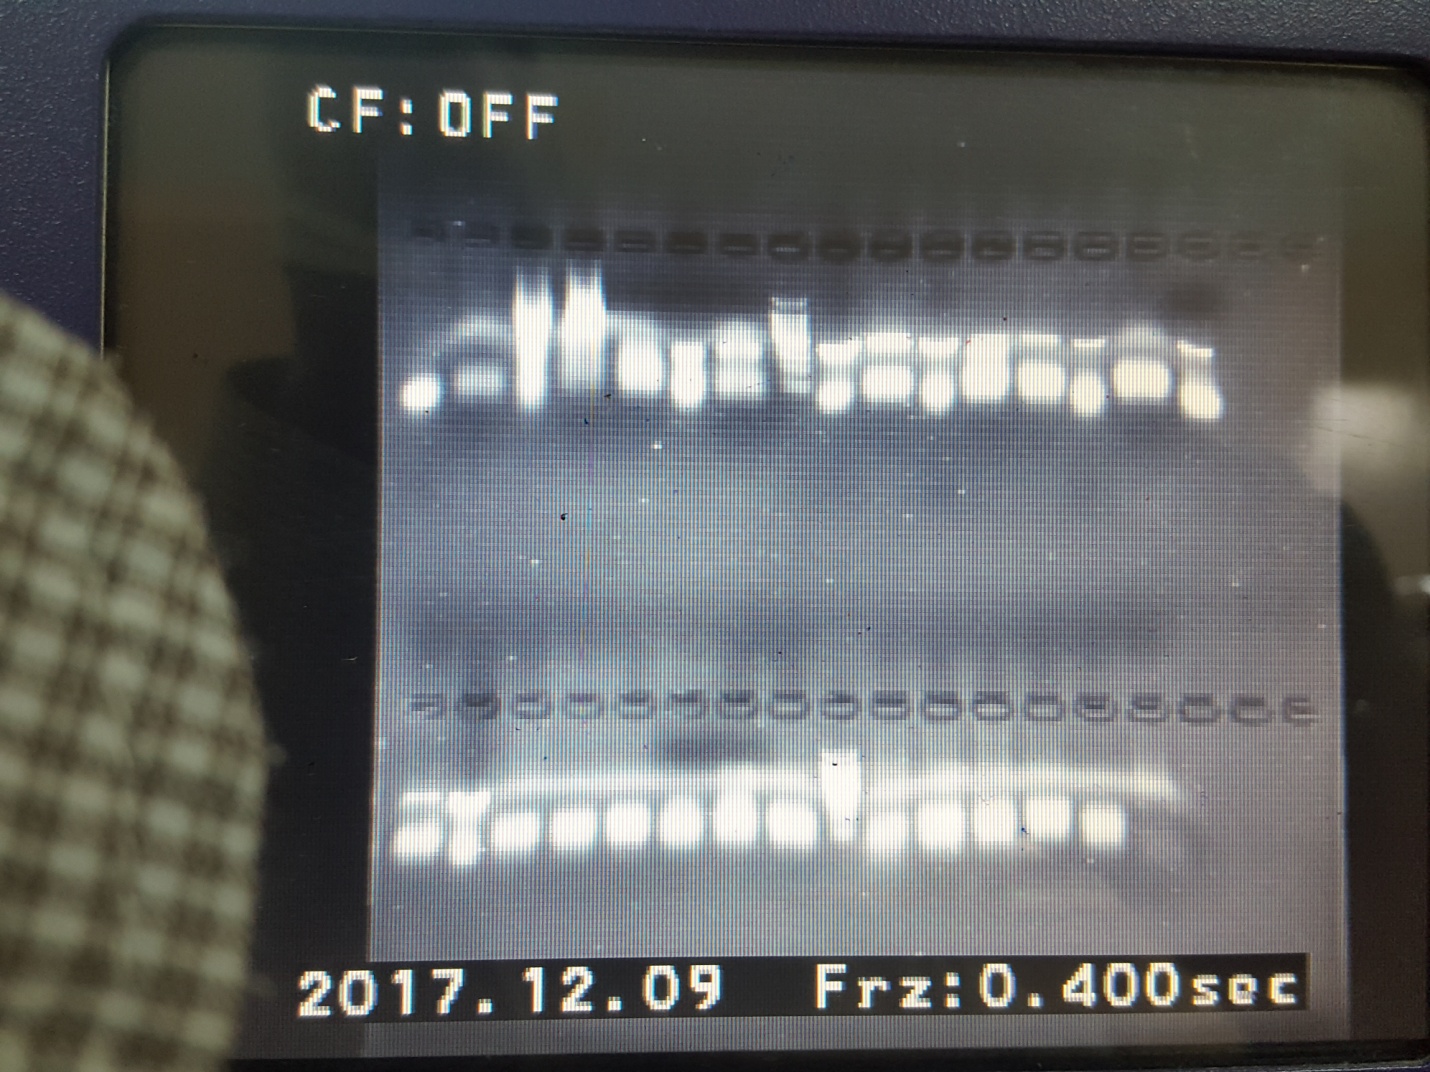

Supplement: Supplementary file 3 [file 7c20006fe928425c123d3e4b.docx]
