# Supplementary material
Source: Research Square preprint supplement (doi:10.21203/rs.3.rs-9696448/v1)

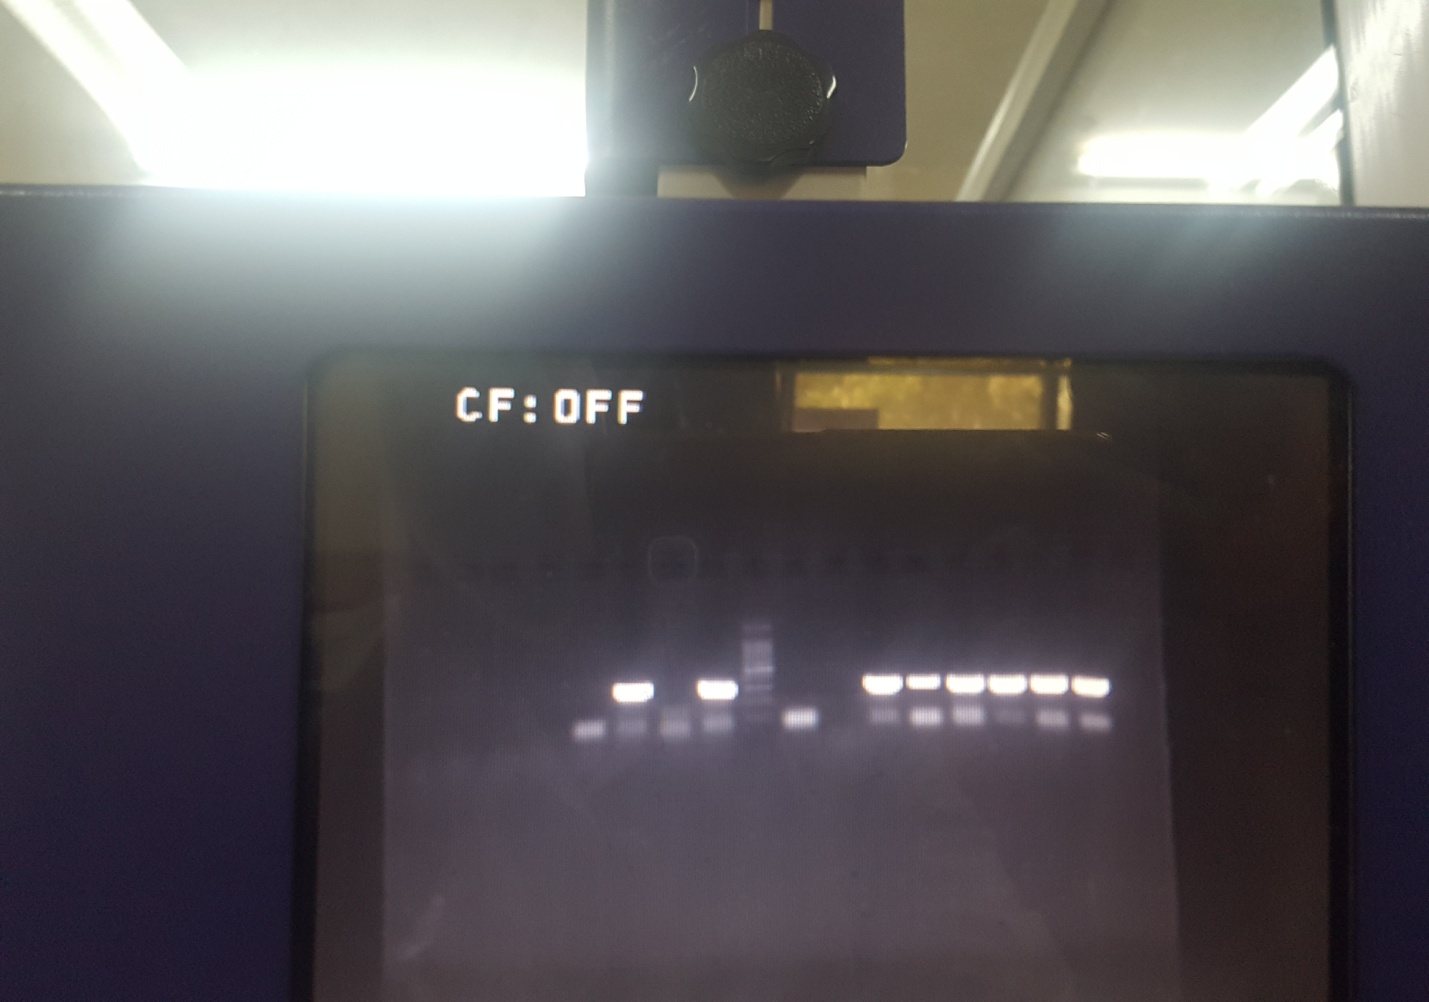


YAP+ (M78) for Brt 14- 52 (with R and Fa rimers)


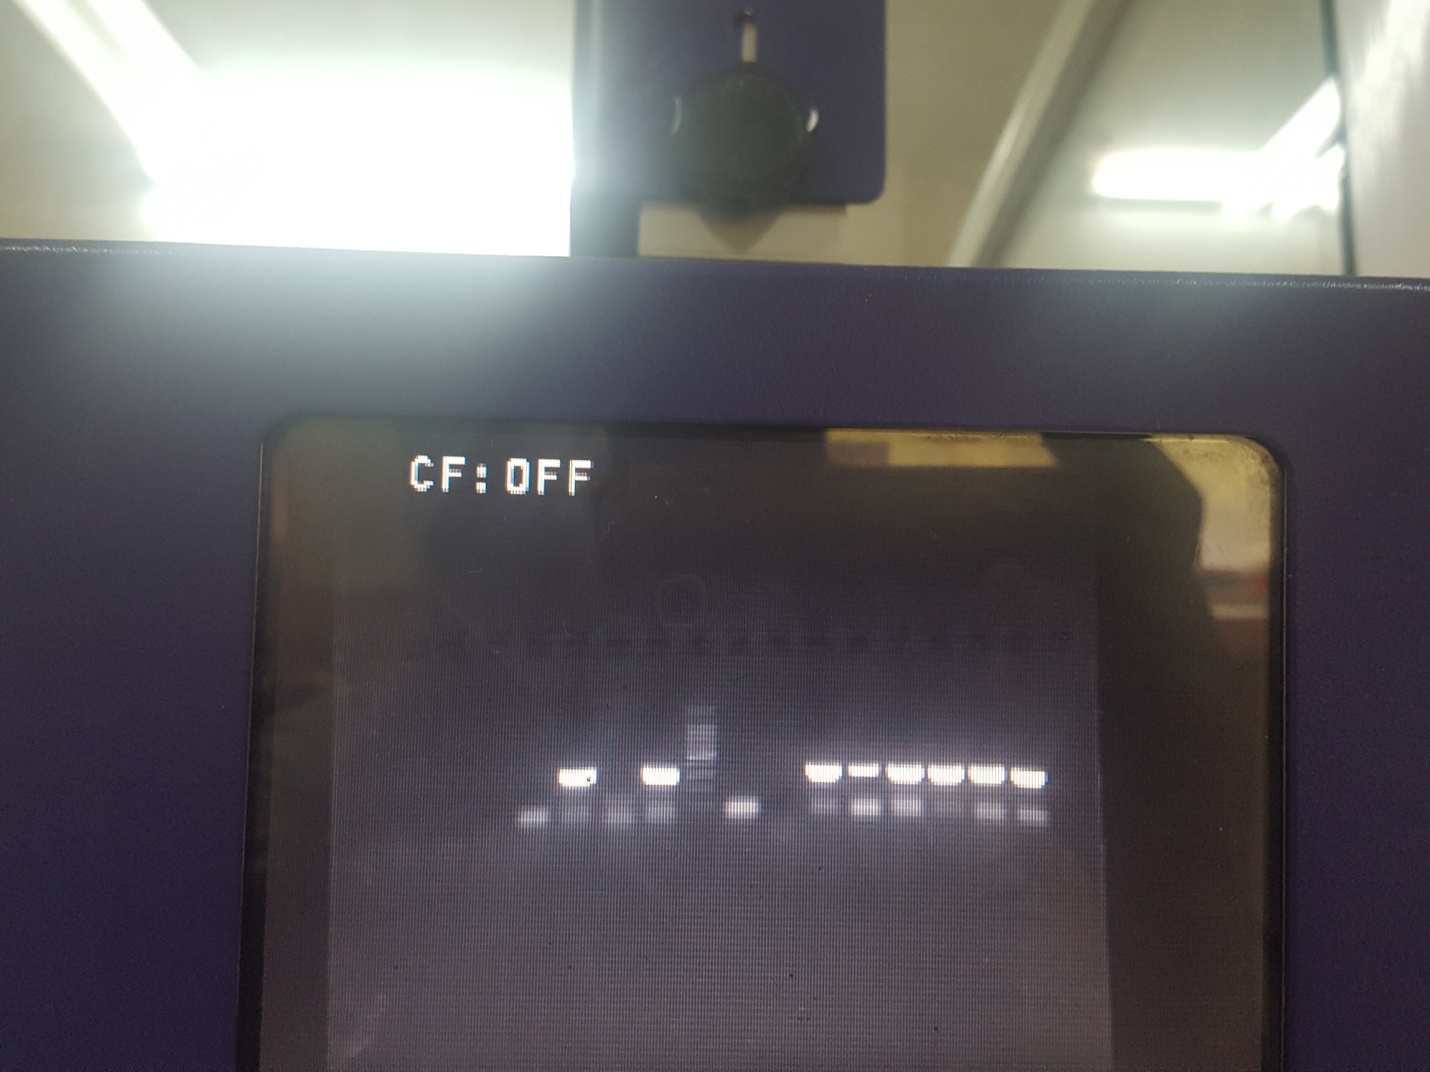


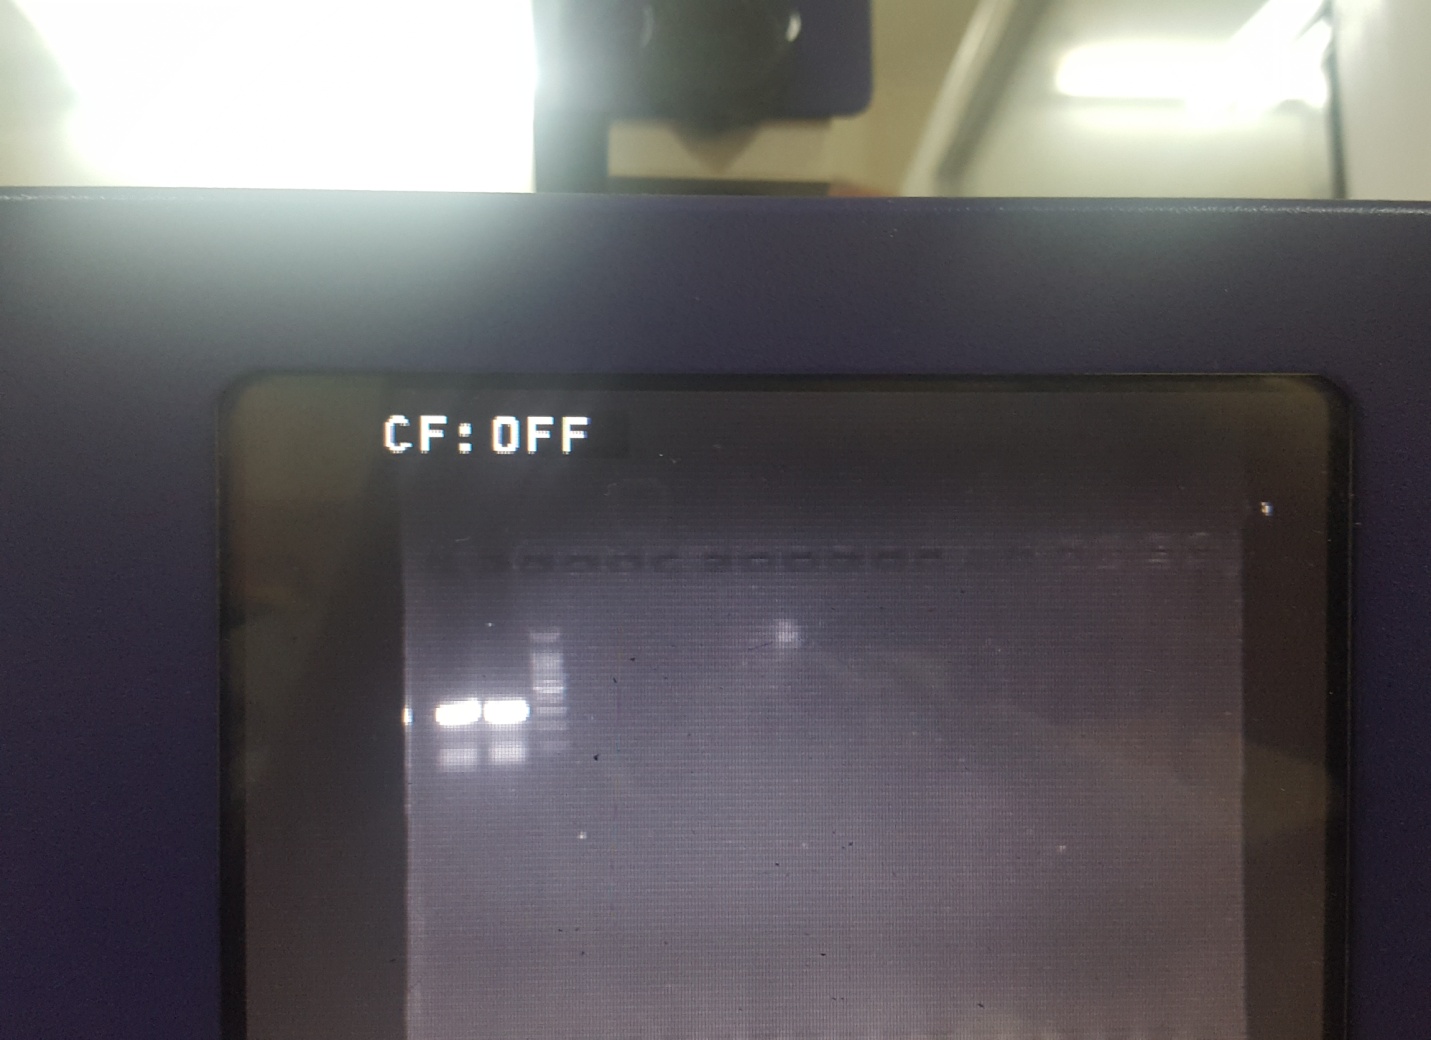


YAP+ (M78) for 53 and 52 (with R and Fa rimers)

YAP+ (M78) for Brt 17, 27 Gmb 16-55 (with R and Fb rimers)


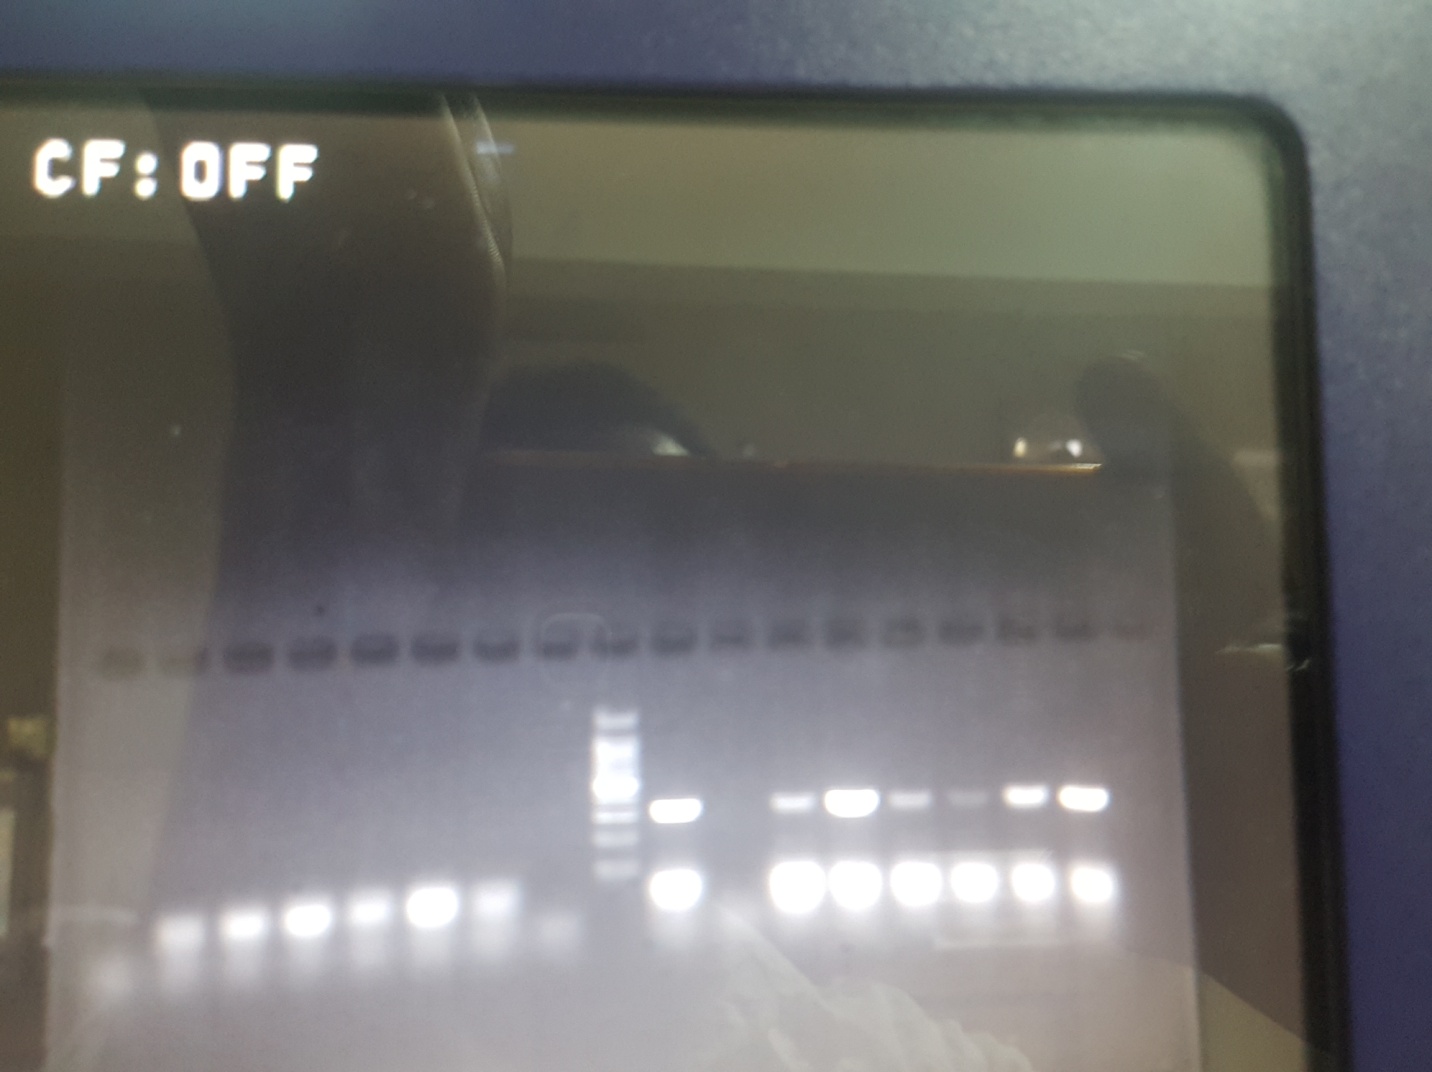


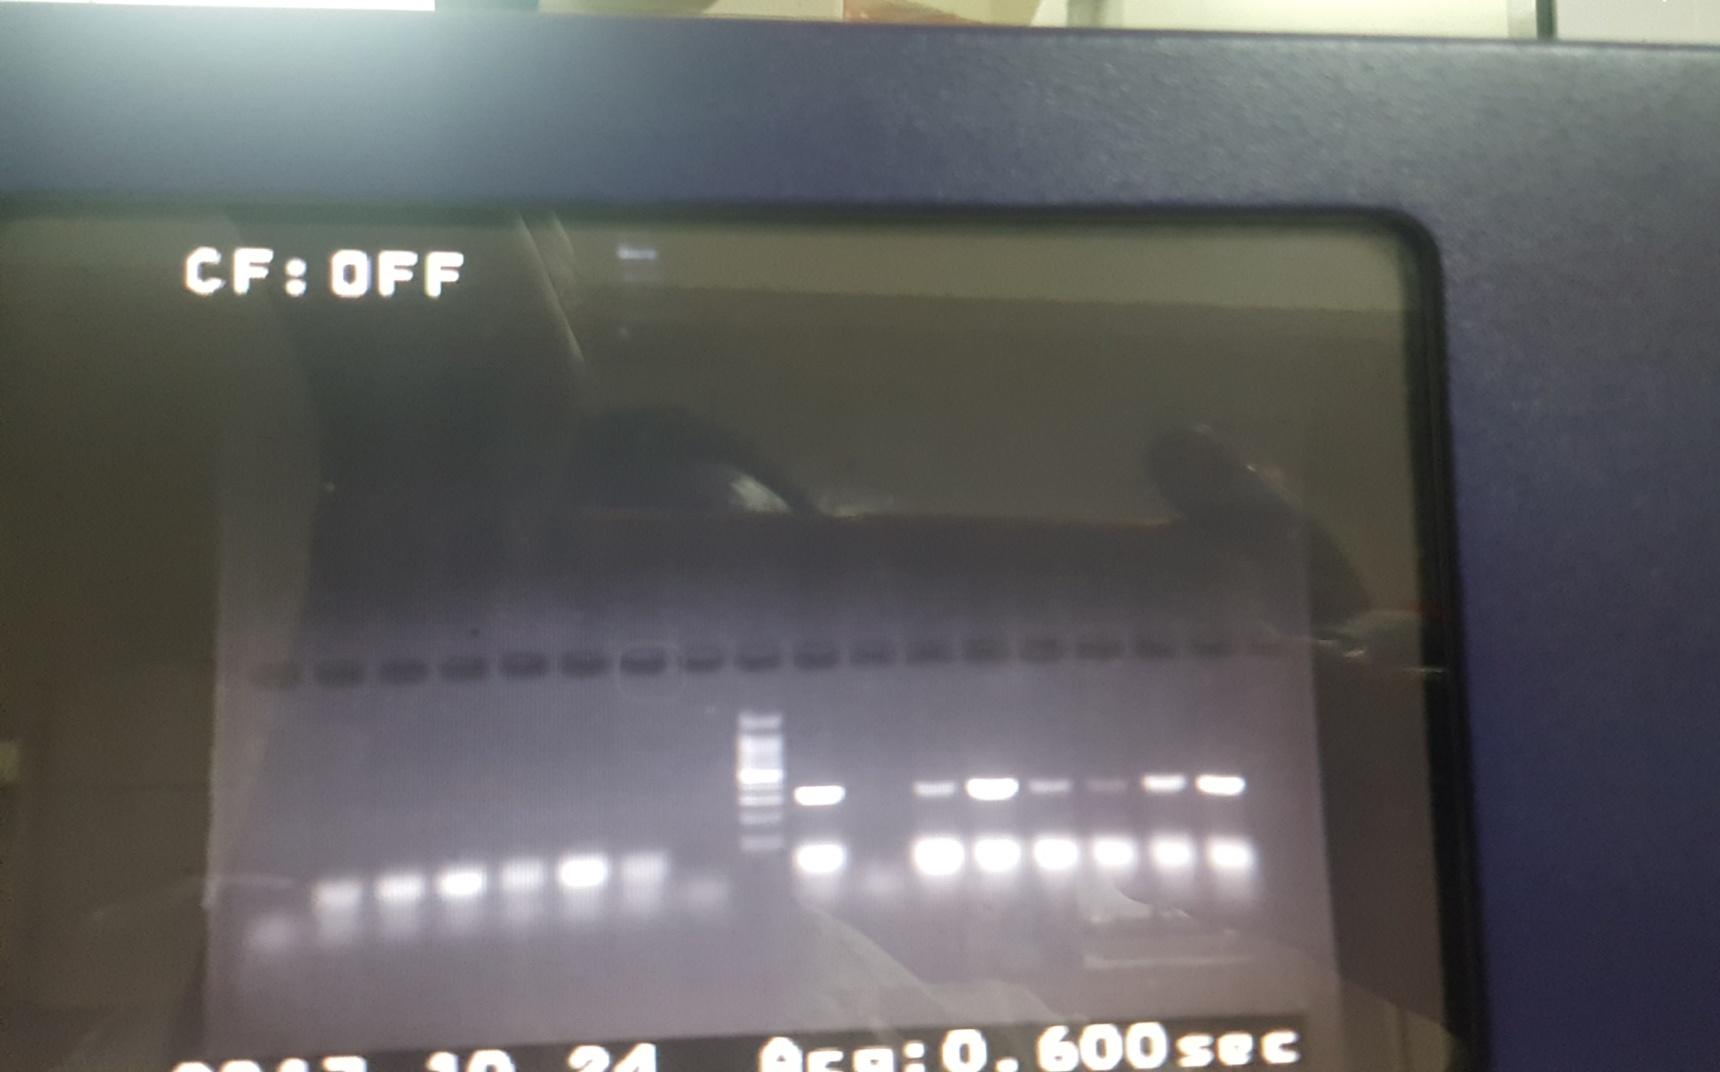


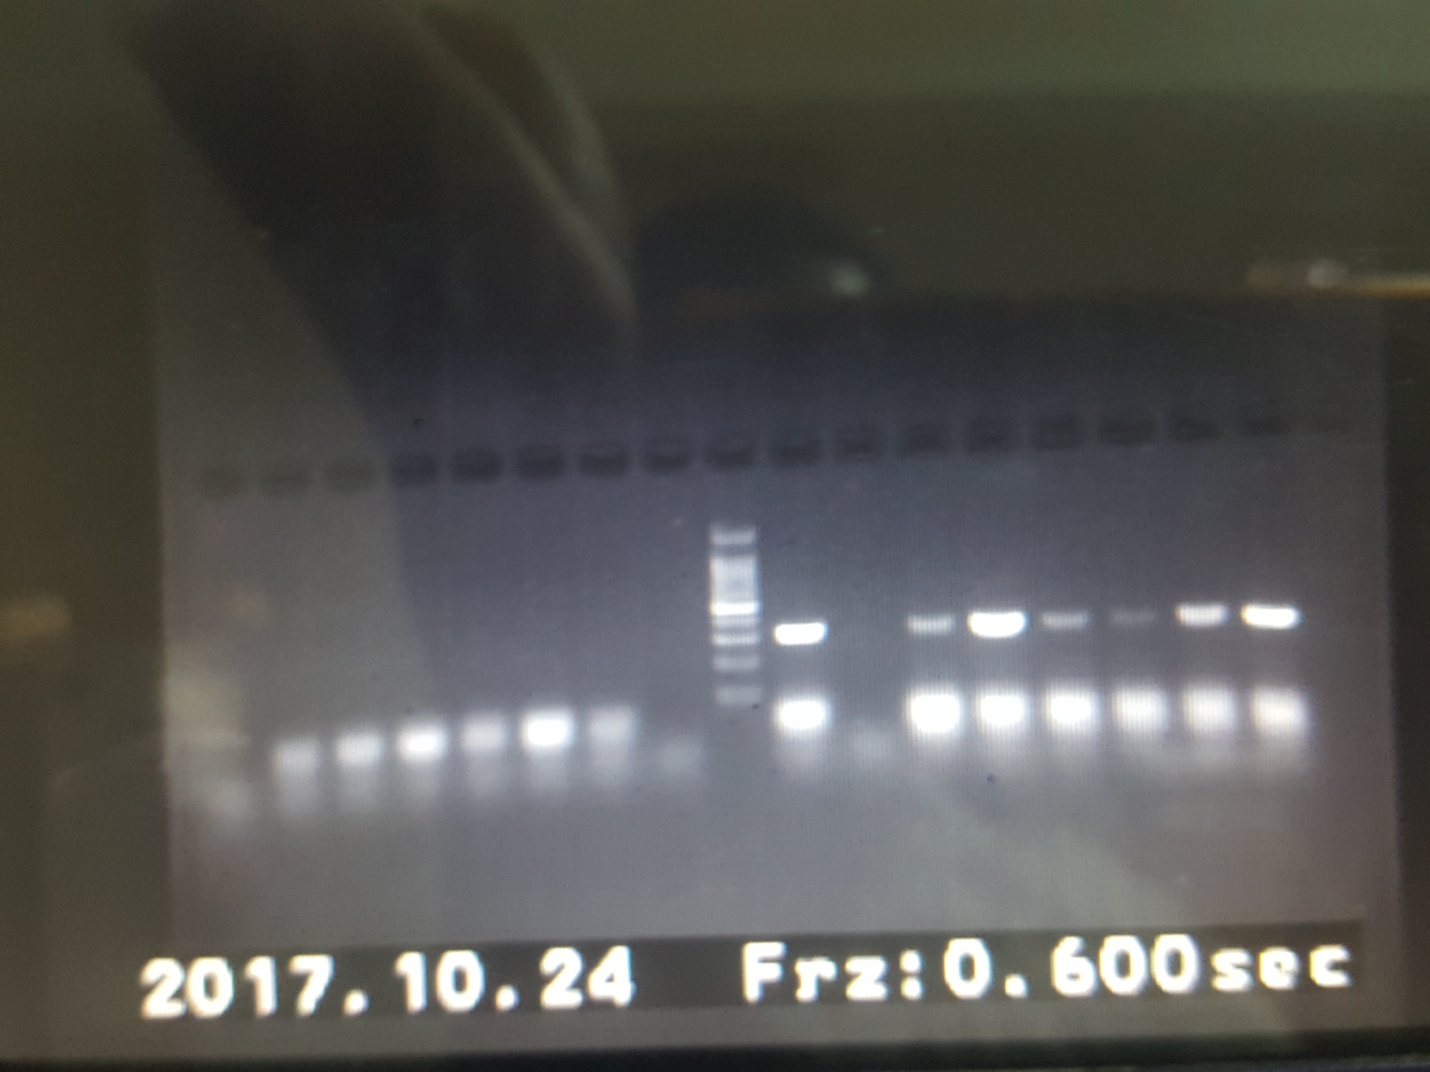


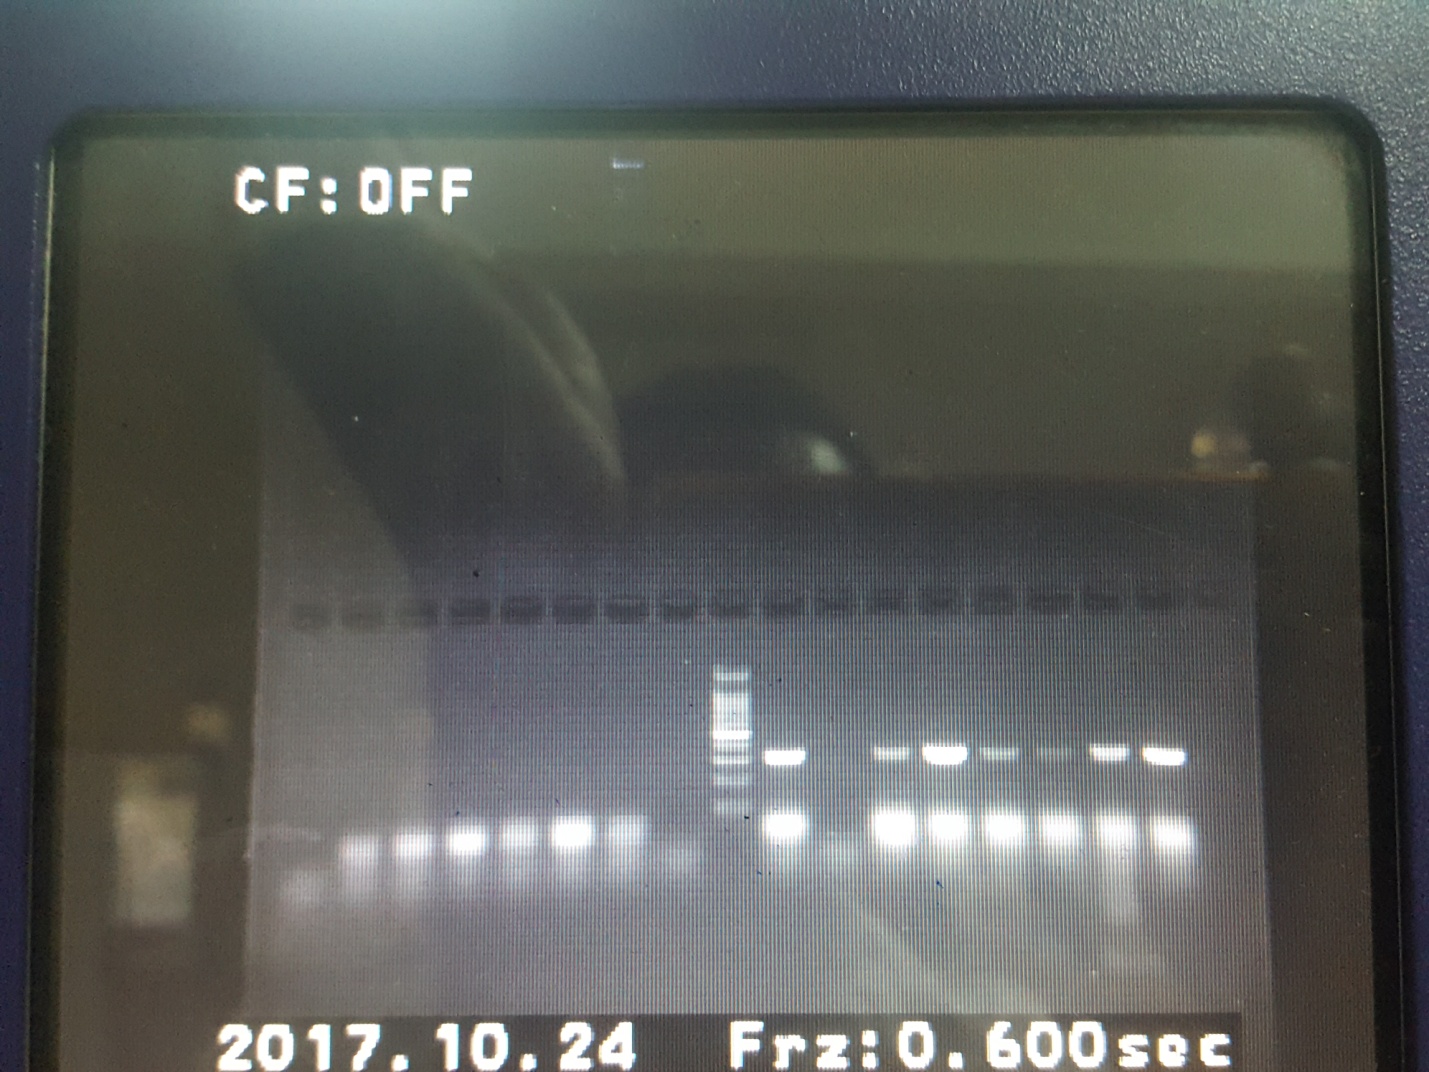

Supplement: Supplementary file 1 [file 5b814361ea01baf1dd1a6ff1.docx]
