# Supplementary material
Source: Research Square preprint supplement (doi:10.21203/rs.3.rs-9696448/v1)

**Figure 3. PCR Amplification of YAP locus to detect the +/- of *Alu* insertion. 100bp DNA marker used. YAP+ is 450 bp and YaAP- is 150 bp**


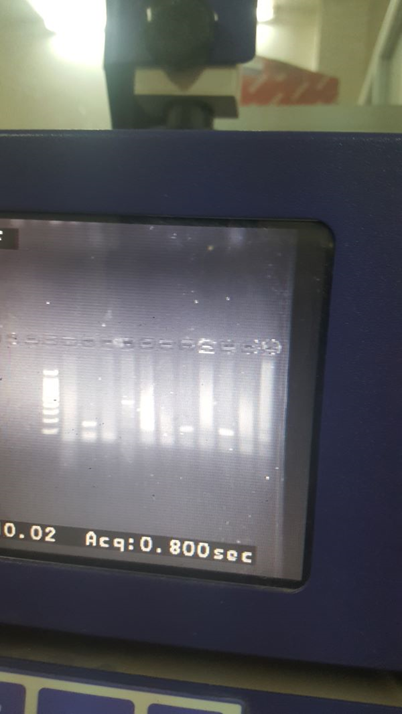

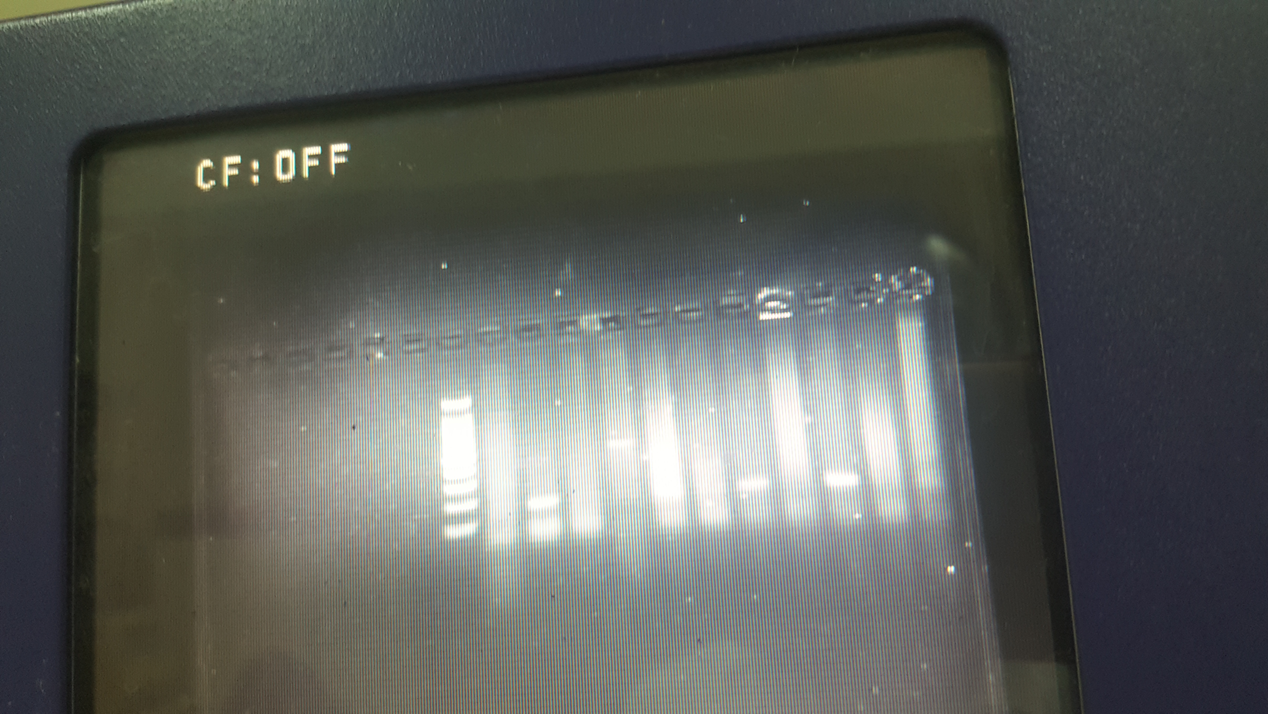

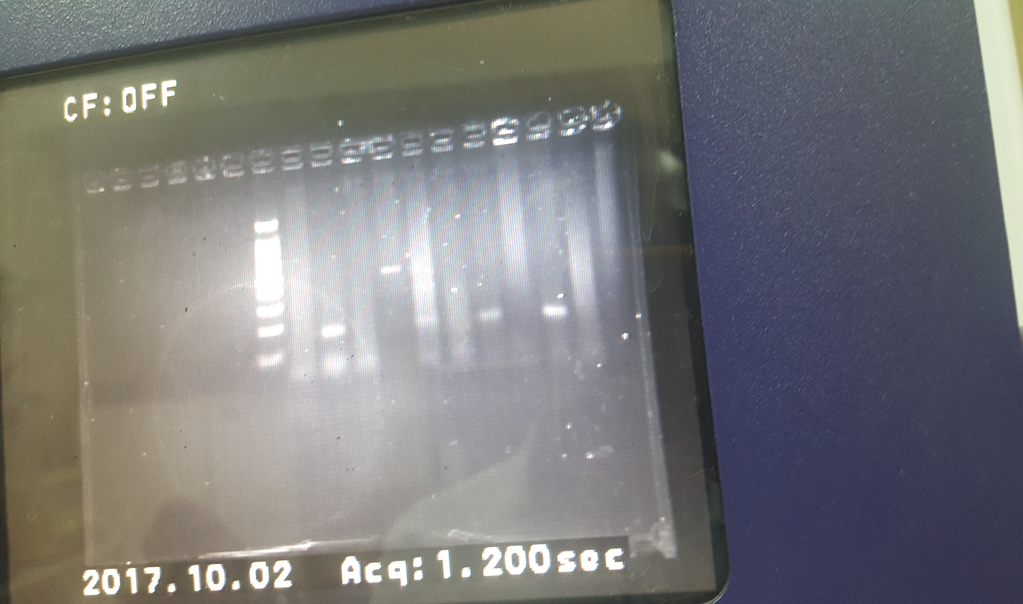

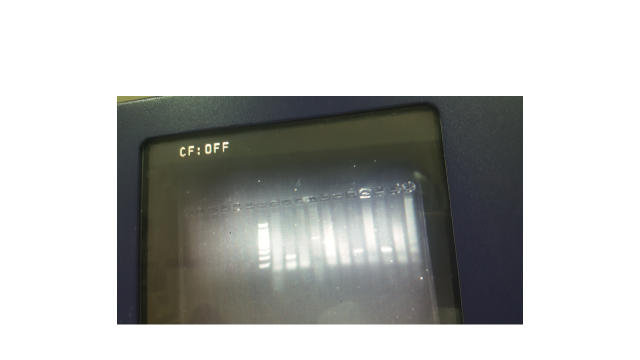

Supplement: Supplementary file 2 [file 6d8161125c6596317809c979.docx]
